# Supplementary material for: Envisaging challenges for the emerging medicinal Cannabis sector in Lesotho
Source: Springer Nature journal article supplement (doi:10.1186/s42238-024-00229-9), 2024-05-16
Supplement: MOESM1 [file 42238_2024_229_MOESM1_ESM.pdf]

# The National University of Lesotho

Telephone: +26622340601  
Fax: +266 22340000  
<http://www.nul.ls>

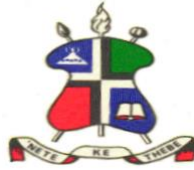

P.O. Roma 180  
Lesotho 29/02/2024

## Faculty of Humanities

### TO WHOM IT MAY CONCERN

This letter serves to confirm that I have edited the manuscript with the title: *Envisaging challenges for the emerging Medicinal Cannabis sector in Lesotho*.

I am an English language practitioner, a professional editor and proofreader with academic literacy and editing skills as well as scholarly peer-reviewing experience, based at the above-mentioned institution. Should there be any queries, please feel free to contact me for clarity.

I look forward to your usual co-operation, thus thanking you in advance.

Yours faithfully



Mokhoele Aaron Hala-hala (PhD)  
Senior Lecturer and Co-ordinator of the Communication & Study Skills Unit  
The Department of English  
The National University of Lesotho  
P. O. Roma 180  
[ma.hala-hala@nul.ls](mailto:ma.hala-hala@nul.ls)  
[mokhoeleahalahala@gmail.com](mailto:mokhoeleahalahala@gmail.com)  
Cell +266 58403924/63832503
